# Supplementary material for: Prebiotic Effect of Berberine and Curcumin Is Associated with the Improvement of Obesity in Mice
Source: MDPI journal article supplement (doi:10.3390/nu13051436), 2021-04-24
Supplement: s1 [file s1]

Supplementary Figure 1. Body weight evolution and cumulative food intake

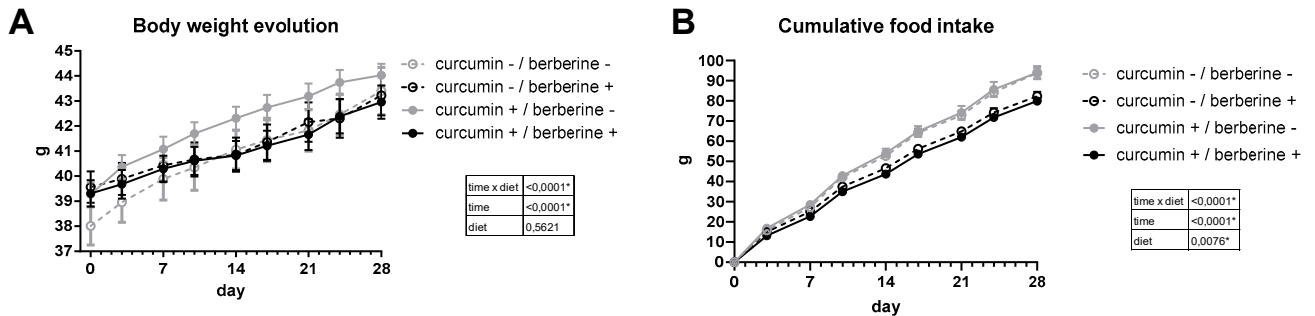

*Ob/ob* mice were fed a standard diet supplemented with or without berberine (bb) or curcumin (cc) for 4 weeks (A: n=9 for each group; B: n=3 for each group). \*p<0.05 (two-way ANOVA).

Supplemental table S1. Primers used in RT-qPCR

| Gene Symbol                 | Gene Name                          | Forward Primer              | Reverse Primer            |
|-----------------------------|------------------------------------|-----------------------------|---------------------------|
| <i>Ccl2</i>                 | Chemokine (C-C motif) ligand 2     | GCAGTTAACGCCCACTCA          | TCCAGCCTACTCATTGGGATCA    |
| <i>Ifng</i>                 | Interferon gamma                   | AGCGGCTGACTGAAGTCAGATTGTAG  | GTCACAGTTTTCAGCTGTATAGGG  |
| <i>Il1β</i>                 | Interleukin 1 beta                 | TCGCTCAGGGTCACAAGAAA        | CATCAGAGGCAAGGAGGAAAAC    |
| <i>IL6</i>                  | Interleukin 6                      | ACAAGTCGGAGGCTTAATTACACAT   | TTGCCATTGCACAACTCTTTTC    |
| <i>Itgax (Cd11c)</i>        | Integrin alpha X                   | CAAAATCTCCAACCCATGCT        | TGTGGTCAGCTCCACAGTTC      |
| <i>Lyz</i>                  | Lysozyme                           | GCCAAGGTCTACAATCGTTGTGAGTTG | CAGTCAGCCAGCTTGACACCACG   |
| <i>Muc2</i>                 | Mucin 2                            | ATGCCACCTCCTCAAAGAC         | GTAGTTTCCGTTGGAACAGTGAA   |
| <i>Ocln</i>                 | Occludin                           | ATGTCCGGCCGATGCTCTC         | TTTGGCTGCTCTTGGGTCTGTAT   |
| <i>Nox1</i>                 | NADPH-oxidase                      | TTGGGTCAGCACTGGCTCTG        | TGGCGGTGTGCAGTGCTATC      |
| <i>Pla2g2a</i>              | Phospholipase A2g2                 | AAGGATCCCCCAAGGATGCCAC      | CAGCCGTTTCTGACAGGAGTTCTGG |
| <i>Gcg</i>                  | Preproglucagon                     | TGGCAGCACGCCCTTC            | GCGCTTCTGTCTGGGA          |
| <i>Pyy</i>                  | Peptide YY                         | GTTTGGACCAGTGGTGAAGA        | TGCCCTCTTCTTAAACCAAACA    |
| <i>Reg3g</i>                | regenerating islet-derived 3-gamma | TTCCTGTCCTCCATGATCAAA       | CATCCACCTCTGTTGGGTTC      |
| <i>Rpl19</i>                | Ribosomal protein L19              | GAAGGTCAAAGGGAATGTGTTCA     | CCTTGCTGCTTCAGCTTGT       |
| <i>Tjp1</i>                 | Tight junction protein 1           | TTTTTGACAGGGGGAGTGG         | TGCTGCAGAGGTCAAAGTTCAAG   |
| <i>Tlr4</i>                 | Toll-like receptor 4               | CCCTCAGCACTCTTGATTGC        | TGCTTCTGTTCTTGACCCA       |
| <i>Tnf</i>                  | Tumor Necrosis Factor              | TCGAGTGACAAGCCTGTAGCC       | TTGAGATCCATGCCGTTGG       |
| <i>Akkermansia spp.</i>     |                                    | CAGCACGTGAAGGTGGGGAC        | CCTTGCGGTTGGCTTCAGAT      |
| <i>Bacteroides spp.</i>     |                                    | GGTGTCCGCTTAAGTGCCAT        | CGGA(C/T)GTAAGGGCCGTGC    |
| <i>Bifidobacterium spp.</i> |                                    | GATTCTGGCTCAGGATGAACGC      | CTGATAGGACGCGACCCCAT      |
| <i>Lactobacillus spp.</i>   |                                    | AGCAGTAGGGAATCTTCCA         | CACCGCTACACATGGAG         |
| <i>Total bacteria</i>       |                                    | ACTCCTACGGGAGGCAGCAG        | ATTACCGCGGCTGCTGG         |

**Supplementary Table S2.** Colonic mRNA levels coding for proteins or peptides involved in the regulation of innate immunity, gut barrier and/or inflammation

| Relative expression      | cc-/bb-                  | cc-/bb+                   | cc+/bb-                   | cc+/bb+                  |
|--------------------------|--------------------------|---------------------------|---------------------------|--------------------------|
| <i>Reg3g</i>             | 1.00 ± 0.28 <sup>a</sup> | 0.11 ± 0.05 <sup>b</sup>  | 0.45 ± 0.18 <sup>ab</sup> | 0.13 ± 0.04 <sup>b</sup> |
| <i>Lyz</i>               | 1.00 ± 0.08              | 0.79 ± 0.08               | 1.65 ± 0.41               | 1.07 ± 0.15              |
| <i>Tjp1</i>              | 1.00 ± 0.03              | 1.03 ± 0.04               | 1.07 ± 0.06               | 0.98 ± 0.03              |
| <i>Ocln</i> <sup>#</sup> | 1.00 ± 0.04 <sup>a</sup> | 0.90 ± 0.03 <sup>ab</sup> | 0.82 ± 0.03 <sup>b</sup>  | 0.78 ± 0.04 <sup>b</sup> |
| <i>Tnf</i>               | 1.00 ± 0.09              | 1.11 ± 0.08               | 2.08 ± 0.77               | 1.26 ± 0.16              |
| <i>Il1b</i> <sup>§</sup> | 1.00 ± 0.12              | 1.14 ± 0.10               | 1.55 ± 0.27               | 0.97 ± 0.89              |
| <i>Il6</i>               | 1.00 ± 0.08              | 1.11 ± 0.08               | 1.18 ± 0.07               | 1.16 ± 0.09              |
| <i>Ifng</i>              | 1.00 ± 0.12              | 2.12 ± 0.42               | 2.18 ± 0.42               | 2.14 ± 0.43              |

*Ob/ob* mice were fed a standard diet supplemented with or without berberine or curcumin for 4 weeks (n=9 for each group). <sup>#</sup>p<0.05 for curcumin effect, <sup>§</sup>p<0.05 for interaction effect (two-way ANOVA). Data with different superscript letters are significantly different at p<0.05 (Tukey post-hoc test).
